# Supplementary material
Source: publisher site journal article supplement (https://www.dovepress.com/article/384997)
Supplement: Supplementary file 1 [file get_supplementary_file.php]

**Appendix Table 1**. Associations between adolescent SDQ scores and free time activities time

|  | (1) | (2) | (3) | (4) | (5) | (6) | (7) | (8) |
| --- | --- | --- | --- | --- | --- | --- | --- | --- |
|  | Total difficulties scores | Standardized total difficulties scores | Prosocial scores | Standardized prosocial scores | Total difficulties Scores | Standardized total difficulties scores | Prosocial scores | Standardized prosocial scores |
| *Panel A* |  |  |  |  |  |  |  |  |
| Screen time=0 | Reference | Reference | Reference | Reference | Reference | Reference | Reference | Reference |
| Screen time<1hr | -0.274* | -0.056* | 0.036 | 0.017 | -0.217 | -0.044 | 0.013 | 0.006 |
|  | (0.144) | (0.029) | (0.069) | (0.032) | (0.144) | (0.029) | (0.068) | (0.032) |
| Screen time 1-2hrs | 0.263 | 0.053 | -0.239*** | -0.113*** | 0.379** | 0.077** | -0.222*** | -0.105*** |
|  | (0.159) | (0.032) | (0.075) | (0.035) | (0.156) | (0.032) | (0.075) | (0.035) |
| Screen time >2hrs | 1.167*** | 0.237*** | -0.473*** | -0.223*** | 1.316*** | 0.268*** | -0.398*** | -0.188*** |
|  | (0.183) | (0.037) | (0.080) | (0.038) | (0.182) | (0.037) | (0.081) | (0.038) |
| *Panel B* |  |  |  |  |  |  |  |  |
| Outdoor time=0 | Reference | Reference | Reference | Reference | Reference | Reference | Reference | Reference |
| Outdoor time <1hr | -0.456** | -0.093** | 0.446*** | 0.211*** | -0.453** | -0.092** | 0.474*** | 0.224*** |
|  | (0.187) | (0.038) | (0.078) | (0.037) | (0.181) | (0.037) | (0.078) | (0.037) |
| Outdoor time 1-2hrs | -0.538*** | -0.109*** | 0.548*** | 0.259*** | -0.522*** | -0.106*** | 0.647*** | 0.306*** |
|  | (0.198) | (0.040) | (0.077) | (0.036) | (0.191) | (0.039) | (0.075) | (0.036) |
| Outdoor time >2hrs | -0.282 | -0.057 | 0.469*** | 0.222*** | -0.240 | -0.049 | 0.621*** | 0.293*** |
|  | (0.222) | (0.045) | (0.090) | (0.042) | (0.214) | (0.043) | (0.089) | (0.042) |
| Student individual and family controls | No | No | No | No | Yes | Yes | Yes | Yes |
| Study time | Yes | Yes | Yes | Yes | Yes | Yes | Yes | Yes |
| Observations | 19791 | 19791 | 19790 | 19790 | 19791 | 19791 | 19790 | 19790 |
| Mean of Dep. Var. | 12.604 | 0.000 | 7.215 | 0.000 | 12.604 | 0.000 | 7.215 | 0.000 |
